# Supplementary material for: The mutational signatures of formalin fixation on the human genome
Source: PubMed Central journal article supplement (PMC9448750; doi:10.1038/s41467-022-32041-5), 2022-09-06
Supplement: 41467_2022_32041_MOESM3_ESM.pdf [file 41467_2022_32041_MOESM3_ESM.pdf]

## Description of Additional Supplementary Files

**Supplementary Data 1** FFPE artefacts signatures in 96-channel format

**Supplementary Data 2** Mutational profiles of FFPE CRC samples

**Supplementary Data 3** Applying recommended FFPEsig workflow on simulated FFPE samples
